# Supplementary material for: Experiences with Policing among People Who Inject Drugs in Bangkok, Thailand: A Qualitative Study
Source: PubMed Central journal article supplement (PMC3858231; doi:10.1371/journal.pmed.1001570), 2013-12-10
Supplement: pmed.1001570.s001.pdf [file pmed.1001570.s001.pdf]

**Mitsampan Community Research Project 2011**  
**Interview Guide for Qualitative Interviews**  
(Excerpt)

**Topic Area II: Encounters with Police**

|                                                                                                                                                                                                                                                                                                                                                                                                                                                                                                                                                                                                            |                                                                                                                                                                                                                                                                                                                                                                                                                                                                                                                                                                                                                                                                                                                                                                                                                                                                                                                                                                                                                                                                                                                                        |
|------------------------------------------------------------------------------------------------------------------------------------------------------------------------------------------------------------------------------------------------------------------------------------------------------------------------------------------------------------------------------------------------------------------------------------------------------------------------------------------------------------------------------------------------------------------------------------------------------------|----------------------------------------------------------------------------------------------------------------------------------------------------------------------------------------------------------------------------------------------------------------------------------------------------------------------------------------------------------------------------------------------------------------------------------------------------------------------------------------------------------------------------------------------------------------------------------------------------------------------------------------------------------------------------------------------------------------------------------------------------------------------------------------------------------------------------------------------------------------------------------------------------------------------------------------------------------------------------------------------------------------------------------------------------------------------------------------------------------------------------------------|
| <p><b>Question:</b><br/>Now I'd like to ask you about your encounters with police. Can you describe the last time you encountered with police?</p> <p>Have you ever had any negative experience when encountering with police? If so, can you tell me what happened?</p> <p>If you have had other negative encounters with the police, could you please describe those?</p> <p>What did you do about it?</p> <p>Have you ever had any positive experience when encountering with police? If so, can you tell me what happened?</p> <p>How did your encounters with police impact your life afterwards?</p> | <p><b>Probes:</b><br/>When and where? What were the circumstances?<br/>Why do you think they approached you?<br/>Why did the police say that they stopped you?<br/>How did the police treat you?<br/>If police arrested you, on what charges were you arrested?</p> <p>When? In what circumstances?<br/><b>Probe for various types of police abuse:</b><br/>Verbal abuse?<br/>Harassment?<br/>Physical violence (e.g., beaten)?<br/>Had drugs planted on you?<br/>Paid bribes?<br/>Police confiscated your drugs, syringes, or other injection equipment?<br/>Arbitrarily arrested (i.e., police arrested you without telling you on what charge they arrested you or without any evidence of the charge)?<br/>Coerced into false confession?</p> <p>Where? When? What were the circumstances?</p> <p>Asked for legal assistance? If not, why?</p> <p>When? In what circumstances?<br/>Did they refer you to:<br/>- harm reduction centers?<br/>- drug treatment centers?</p> <p>How did it influence:<br/>- your place to stay?<br/>- your relationship with your family?<br/>- your interactions with the community you live in?</p> |
|------------------------------------------------------------------------------------------------------------------------------------------------------------------------------------------------------------------------------------------------------------------------------------------------------------------------------------------------------------------------------------------------------------------------------------------------------------------------------------------------------------------------------------------------------------------------------------------------------------|----------------------------------------------------------------------------------------------------------------------------------------------------------------------------------------------------------------------------------------------------------------------------------------------------------------------------------------------------------------------------------------------------------------------------------------------------------------------------------------------------------------------------------------------------------------------------------------------------------------------------------------------------------------------------------------------------------------------------------------------------------------------------------------------------------------------------------------------------------------------------------------------------------------------------------------------------------------------------------------------------------------------------------------------------------------------------------------------------------------------------------------|

**Text S1**

|                                                                                                                                                                                                                                                                                                                                                                                          |                                                                                                                                                                                                                                                                                                                                                                                                                                                                                                                                                                                                                                                                                                                                                                                                       |
|------------------------------------------------------------------------------------------------------------------------------------------------------------------------------------------------------------------------------------------------------------------------------------------------------------------------------------------------------------------------------------------|-------------------------------------------------------------------------------------------------------------------------------------------------------------------------------------------------------------------------------------------------------------------------------------------------------------------------------------------------------------------------------------------------------------------------------------------------------------------------------------------------------------------------------------------------------------------------------------------------------------------------------------------------------------------------------------------------------------------------------------------------------------------------------------------------------|
| <p>How did your encounters with police affect your drug use patterns?</p> <p>How do your encounters with police and police presence shape your access to health care?</p> <p>How do the police identify and detain drug users?</p> <p>Can you tell me anything you are doing to avoid encountering with police, if any?</p> <p>Would you like to say anything else about this topic?</p> | <p>- your access to health care services?<br/>- your access to employment and jobs ?</p> <p><b>Probe for:</b><br/>Types of drugs you use?<br/>Sources of drugs you use?<br/>Frequency of drug use?<br/>The way you use drugs (e.g., shifted to injecting into groin or deep vein injecting)?<br/>Rushing injection?<br/>Places where you use drugs<br/>The time when you use drugs?</p> <p>How do the police know who may be a drug user?<br/>Where do the police look for drug users?</p> <p><b>Probe for:</b><br/>Near health service outlets?<br/>Near centers where methadone is distributed?<br/>Near places where syringes can be obtained?<br/>Near known drug market locations?</p> <p>Are there places that you avoid so that you do not encounter police? If so, what are these places?</p> |
|------------------------------------------------------------------------------------------------------------------------------------------------------------------------------------------------------------------------------------------------------------------------------------------------------------------------------------------------------------------------------------------|-------------------------------------------------------------------------------------------------------------------------------------------------------------------------------------------------------------------------------------------------------------------------------------------------------------------------------------------------------------------------------------------------------------------------------------------------------------------------------------------------------------------------------------------------------------------------------------------------------------------------------------------------------------------------------------------------------------------------------------------------------------------------------------------------------|
